# Supplementary material
Source: publisher figshare collection journal article supplement (https://future-science-group.figshare.com/ndownloader/files/30613371)
Supplement: Supplementary file [file 30613371]

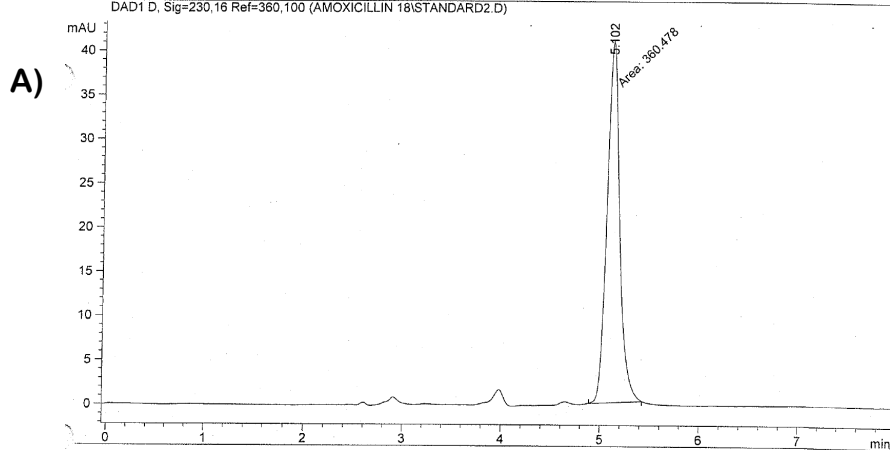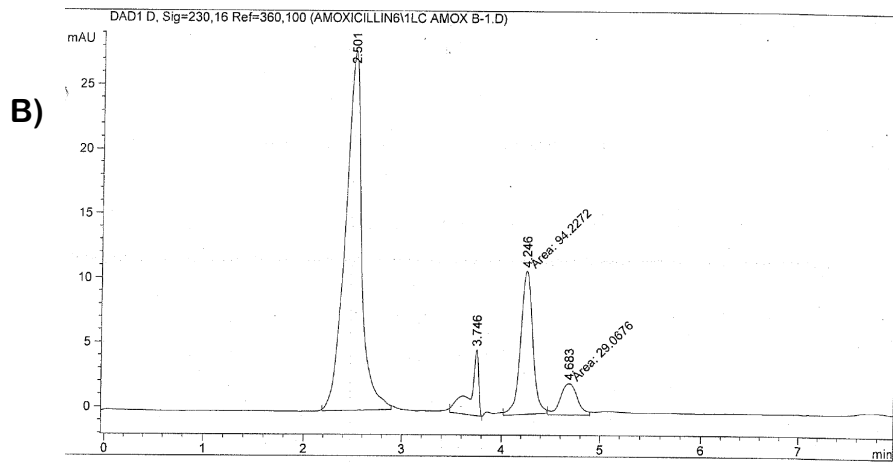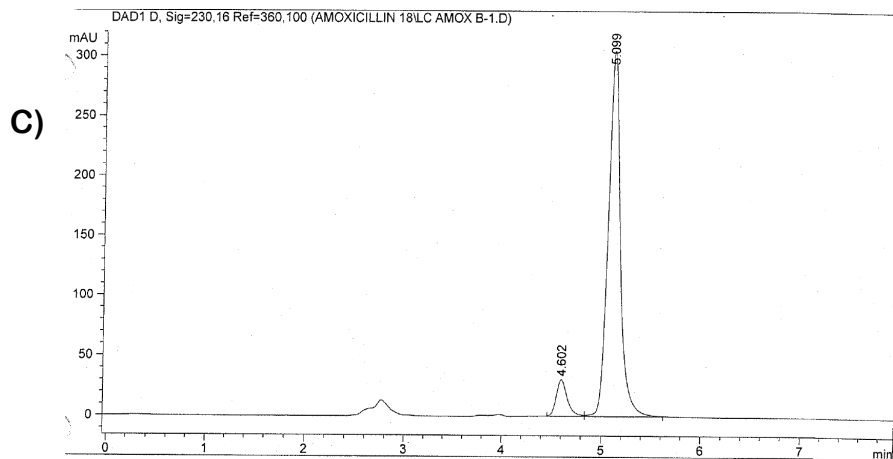

Supplementary Figures S1. HPLC peaks for amoxicillin: A) standard antibiotic load 10 ppm (2.0 ng/ul); B) intracellular antibiotic in *E. coli* cells treated with the antibiotic and FS-1; C) intracellular antibiotic in *E. coli* cells treated with the antibiotic only. Axis X depicts elution minutes; axis Y - milli-Absorbance Units (mAU).
